# Supplementary material for: A robust surface with superhydrophobicity and underwater superoleophobicity for on-demand oil/water separation
Source: Royal Society of Chemistry journal article supplement (doi:10.1039/d1nr04658f), 2021-01-01
Supplement: d1nr04658f1.pdf [file d1nr04658f1.pdf]

## Supplementary Information

### **A robust surface with superhydrophobicity and underwater superoleophobicity for on-demand oil/water separation**

Siyang Zhao,<sup>ac</sup> Yongmin Liang,<sup>ad</sup> Yu Yang,<sup>e</sup> Jinxia Huang,<sup>\*a</sup> Zhiguang Guo,<sup>\* a b</sup> and Weimin Liu<sup>\*a</sup>

<sup>a</sup> State Key Laboratory of Solid Lubrication, Lanzhou Institute of Chemical Physics, Chinese Academy of Sciences, Lanzhou 730000, P. R. China

<sup>b</sup> Ministry of Education Key Laboratory for the Green Preparation and Application of Functional Materials, Hubei University, Wuhan 430062, P. R. China

<sup>c</sup> University of Chinese Academy of Sciences, Beijing 100049, P. R. China

<sup>d</sup> State Key Laboratory of Applied Organic Chemistry, Lanzhou University, Lanzhou 730000, People's Republic of China

<sup>e</sup> College of Mechanical Engineering and Automation, Fuzhou University, Fuzhou 350116, People's Republic of China

\* E-mail: [zguo@licp.cas.cn](mailto:zguo@licp.cas.cn) (Z. Guo); [huangjx@licp.cas.cn](mailto:huangjx@licp.cas.cn) (Huang)  
[wmliu@licp.cas.cn](mailto:wmliu@licp.cas.cn) (W. Liu).

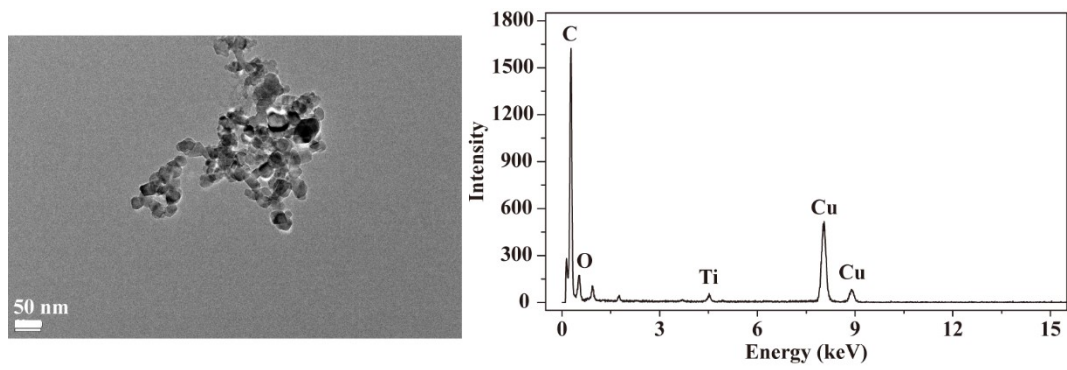

**Fig. S1** TEM image and EDS spectrum of  $\text{TiO}_2$  nanoparticles.

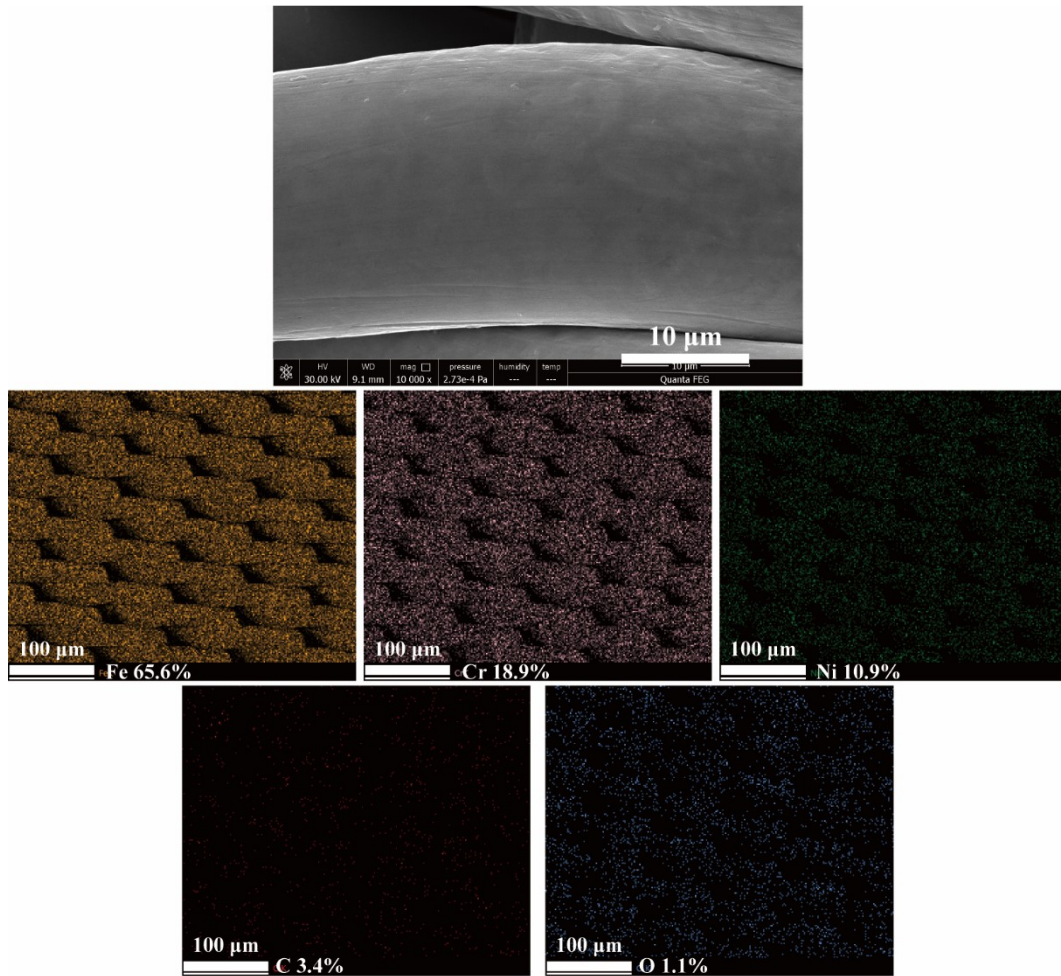

**Fig. S2** SEM image and element mapping images of original SSM.

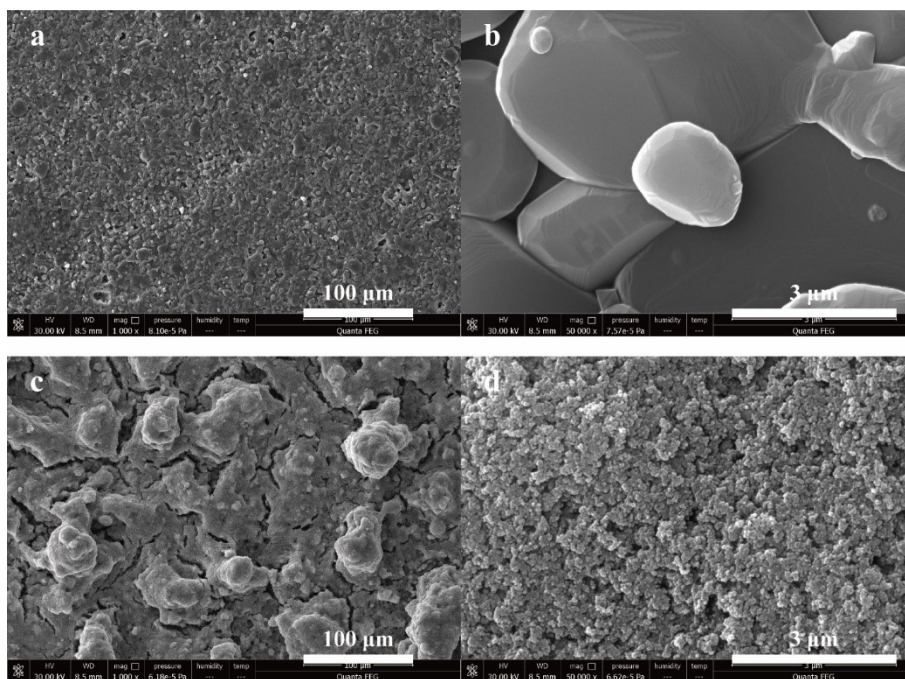

**Fig. S3** SEM images of the original (a, b) and TiO<sub>2</sub>@FOTS-AP-coated (c, d) ceramic.

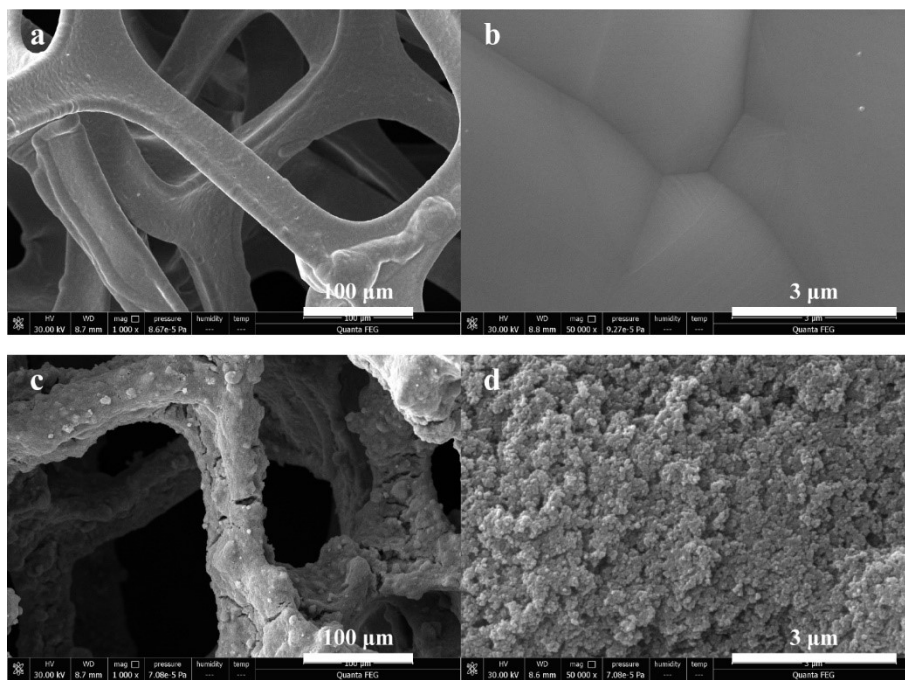

**Fig. S4** SEM images of the original (a, b) and TiO<sub>2</sub>@FOTS-AP-coated (c, d) NF.

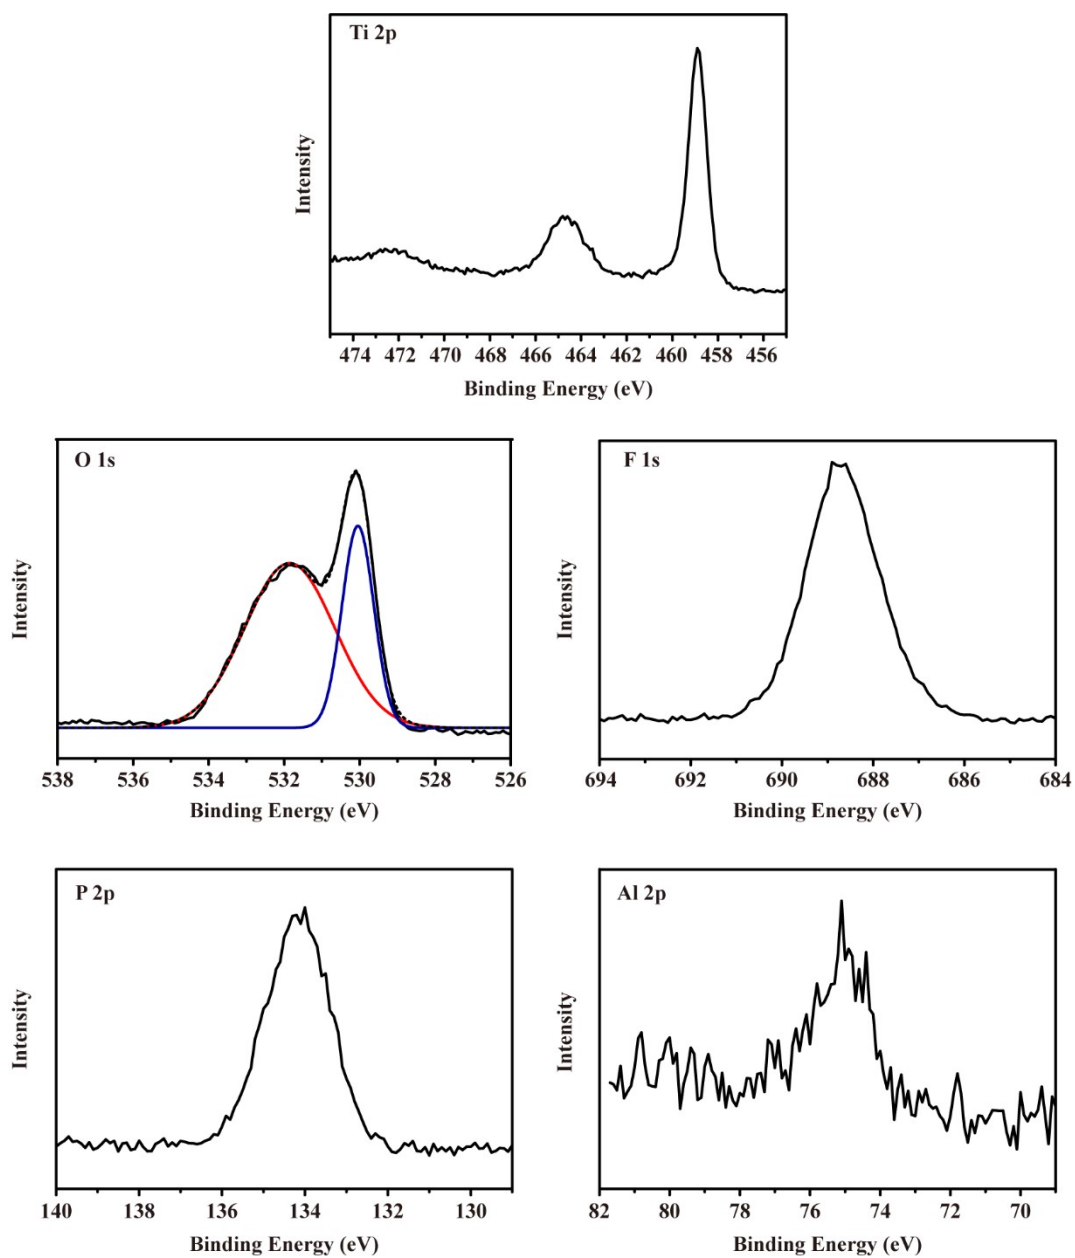

**Fig. S5** XPS spectra of the TiO<sub>2</sub>@FOTS-AP-coated SSM.

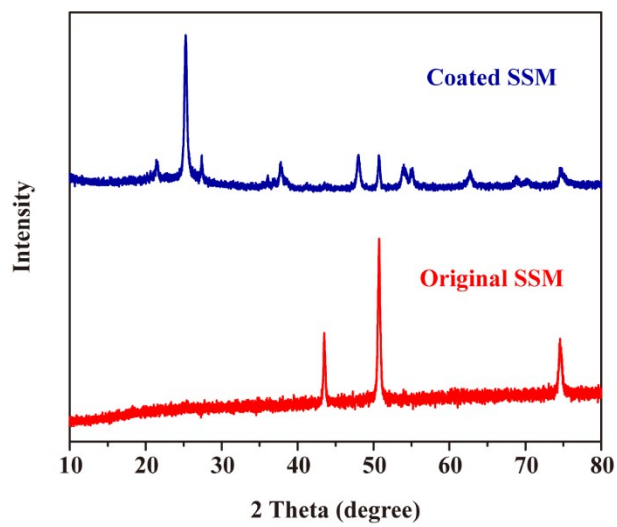

**Fig. S6** XRD patterns of original and AP-TiO<sub>2</sub>-FOTS-coated SSM.

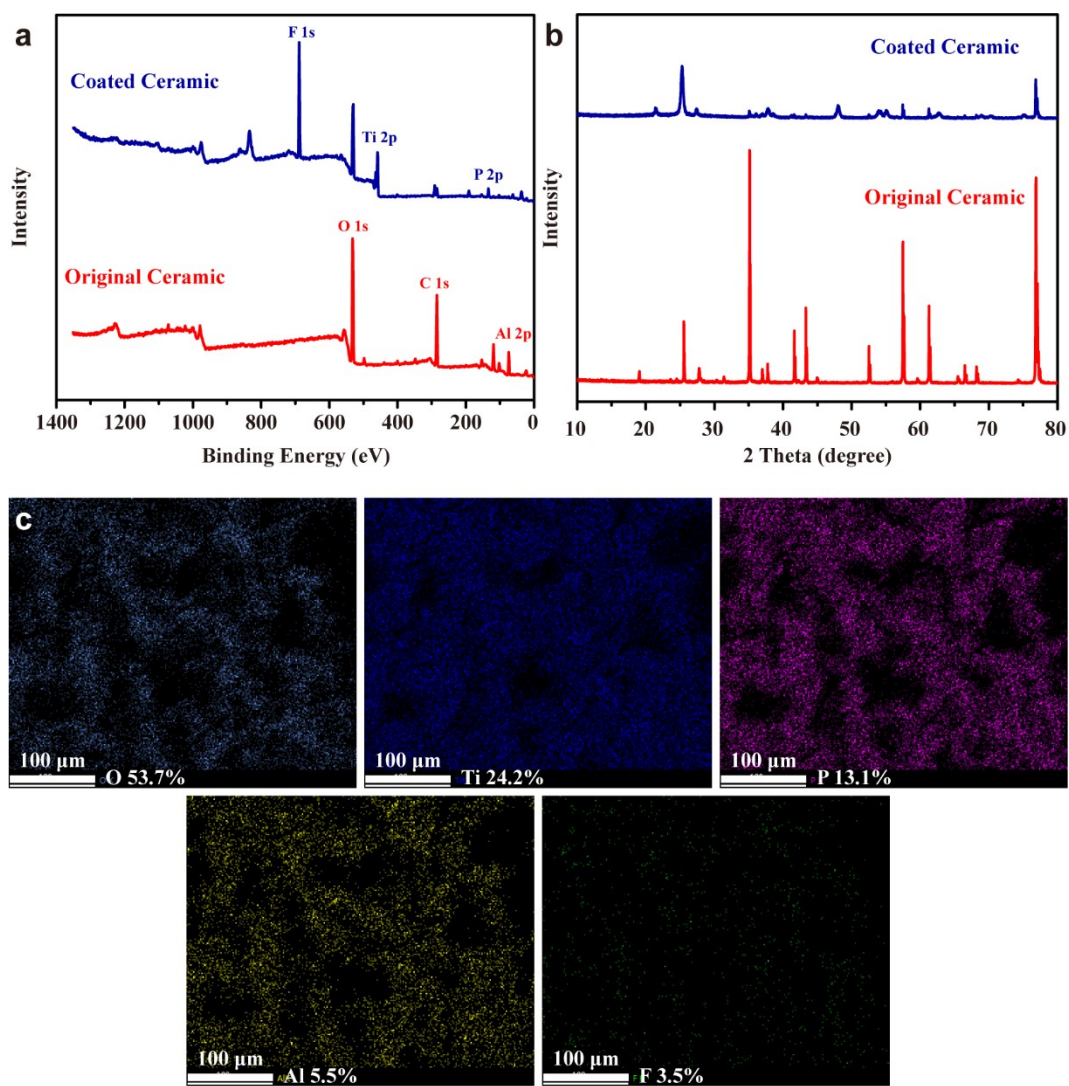

**Fig. S7** (a) XPS spectra of original and  $\text{TiO}_2$ @FOTS-AP-coated ceramic. (b) XRD patterns of original and  $\text{TiO}_2$ @FOTS-AP-coated ceramic. (c) Element mapping images of  $\text{TiO}_2$ @FOTS-AP-coated ceramic.



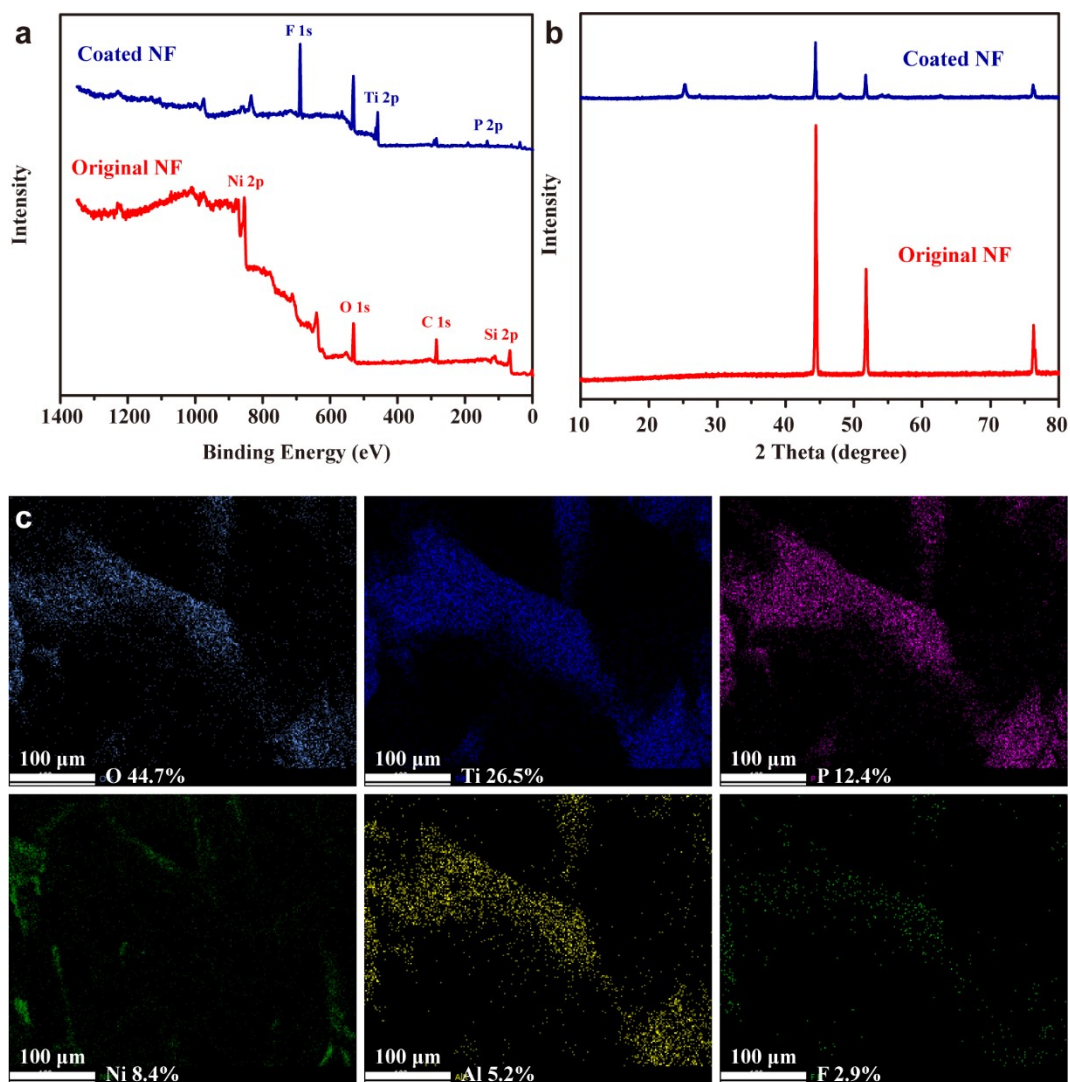

**Fig. S8** (a) XPS spectra of original and TiO<sub>2</sub>@FOTS-AP-coated NF. (b) XRD patterns of original and TiO<sub>2</sub>@FOTS-AP-coated NF. (c) Element mapping images of TiO<sub>2</sub>@FOTS-AP-coated NF.

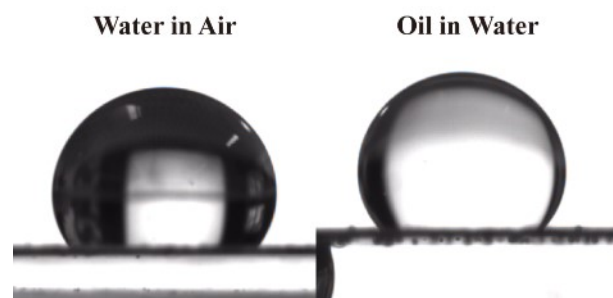

**Fig. S9** Photographs of water droplets in air and oil droplets in water on the surfaces of original SSMS.

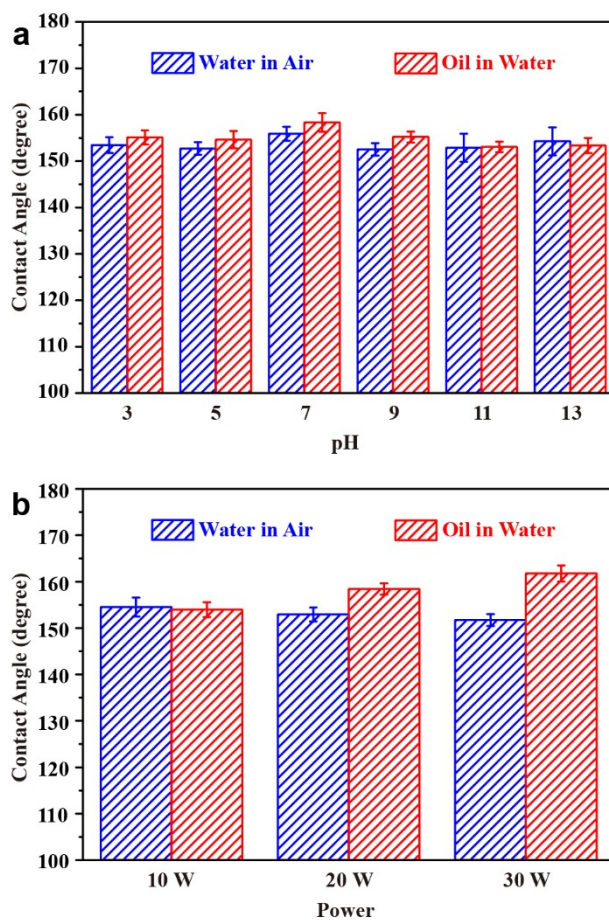

**Fig. S10** (a) Water contact angles in air and oil contact angles in water of the  $\text{TiO}_2\text{@FOTS-AP}$ -coated SSMs with aqueous solutions of different pH. (b) Contact angles of water in air and oil in water after  $\text{O}_2$ -plasma etching with different power. 1, 2-dichloroethane was selected as oil.

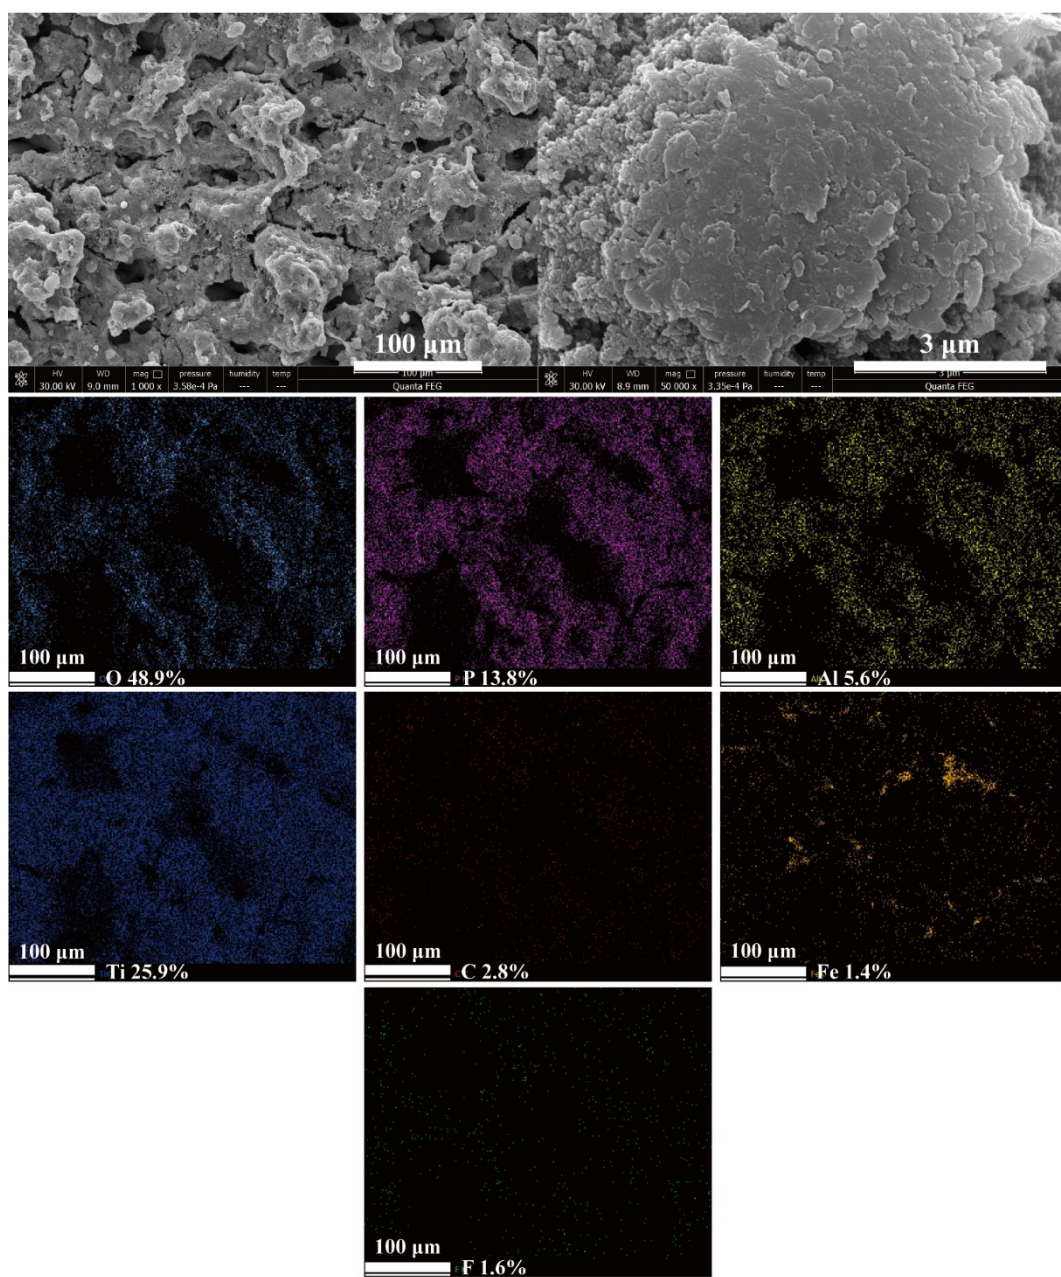

**Fig. S11** SEM images and element mapping images of TiO<sub>2</sub>@FOTS-AP-coated SSM after 100 impingement cycles.

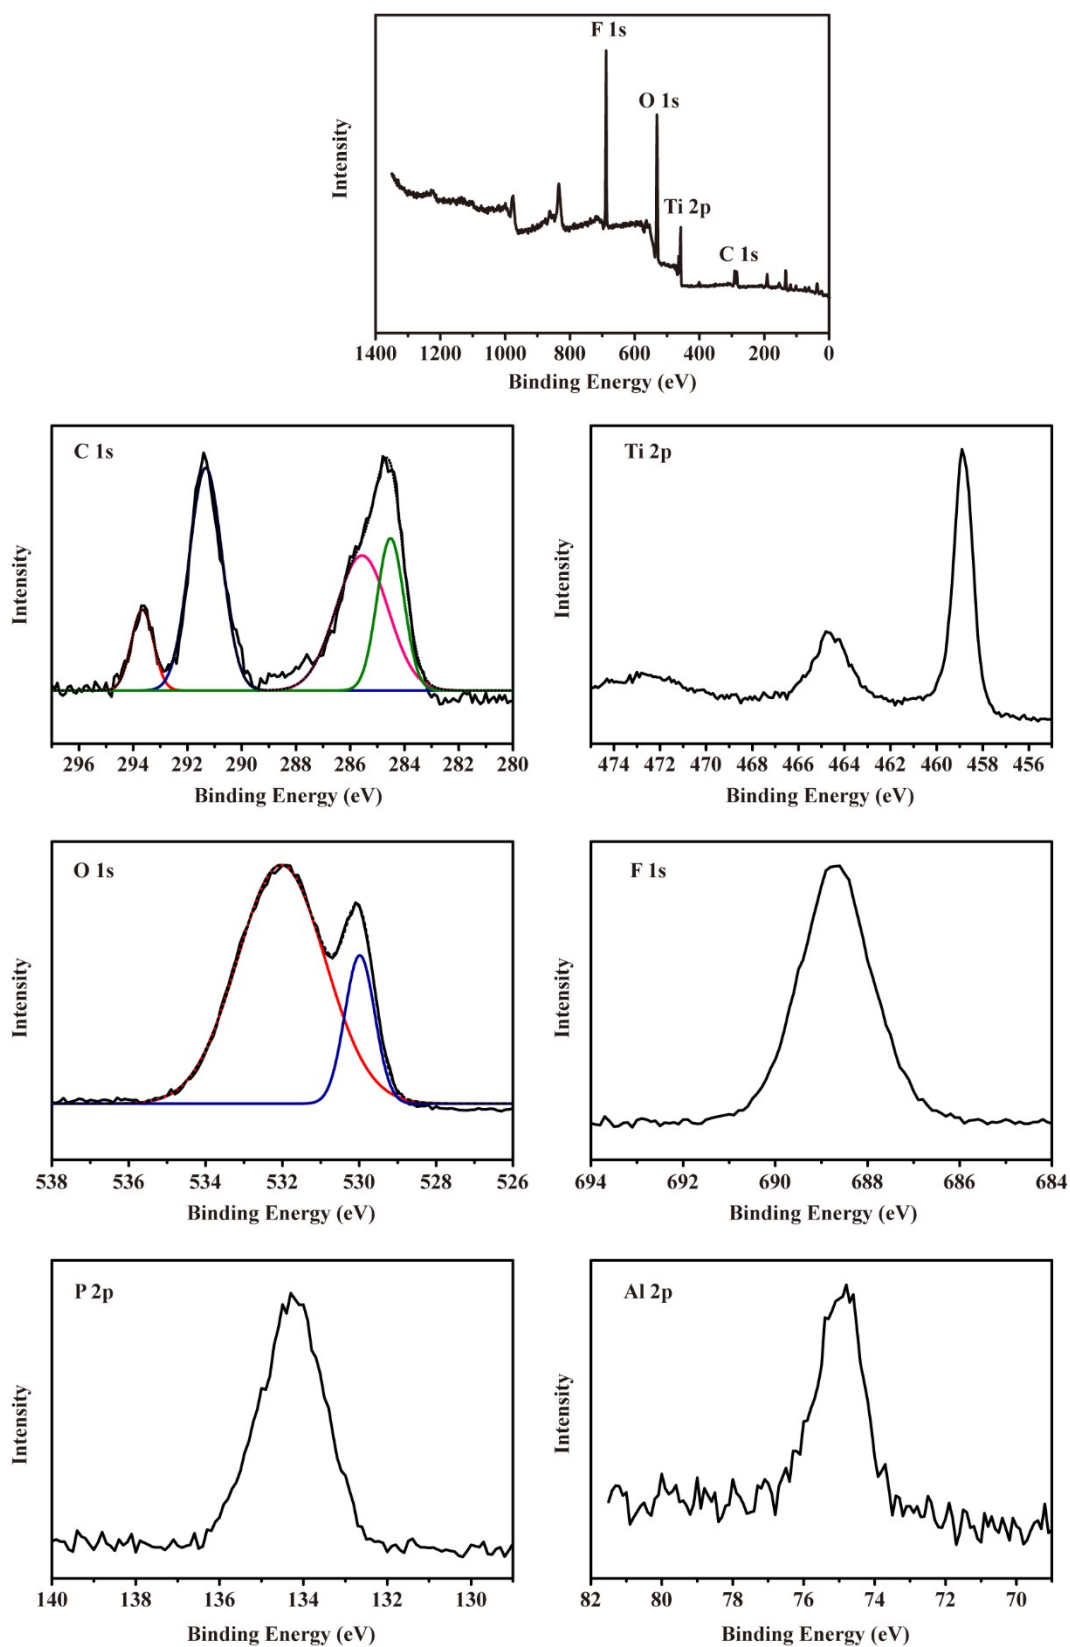

**Fig. S12** XPS spectra of TiO<sub>2</sub>@FOTS-AP-coated SSM after 100 impingement cycles.

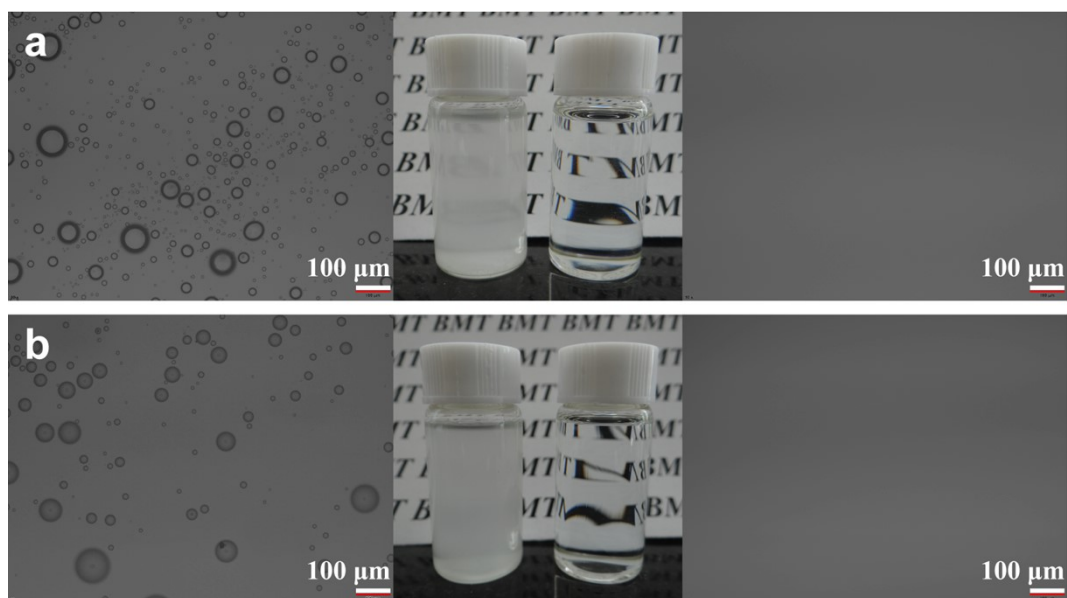

**Fig. S13** Optical photographs of (a) water-in-xylene and (b) water-in-chloroform before (left) and after (right) separation by  $\text{TiO}_2$ @FOTS-AP-coated SSMs.

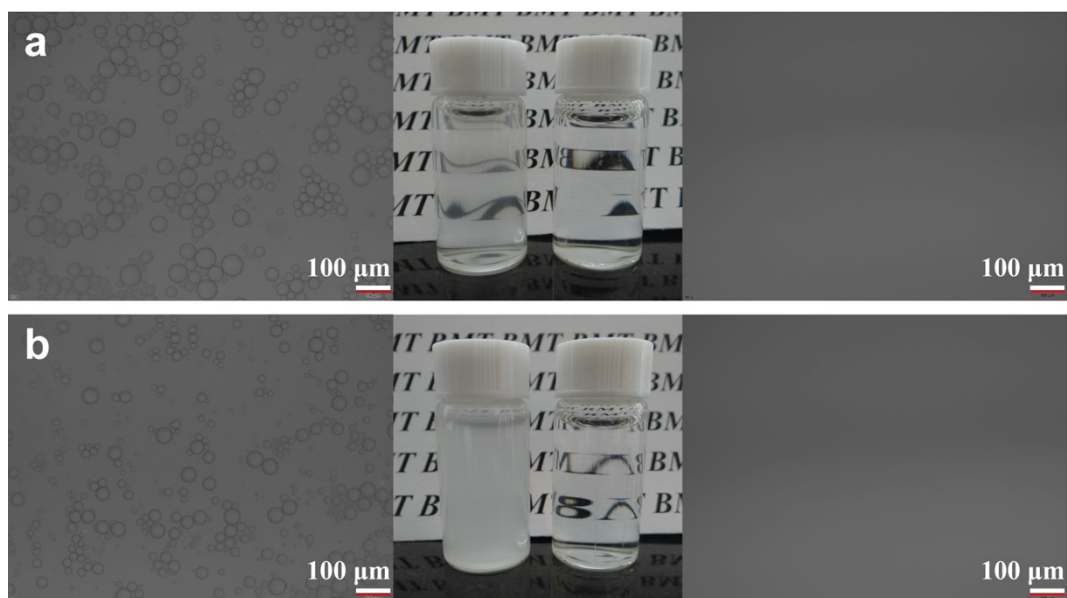

**Fig. S14** Optical photographs of (a) hexane-in-water and (b) petroleum ether-in-water before (left) and after (right) separation by  $\text{TiO}_2@\text{FOTS-AP}$ -coated SSMs.

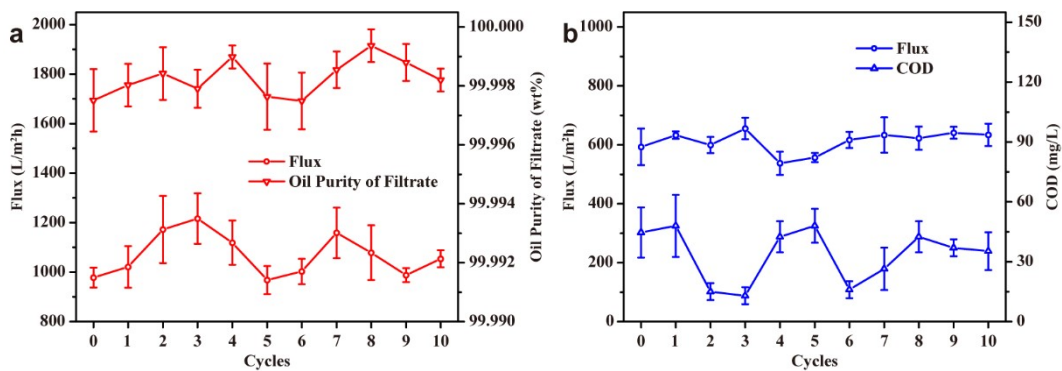

**Fig. S15** (a) Plots of water-in-oil emulsion separation cycles with fluxes and oil purities of filtrates. (b) Plots of oil-in-water emulsion separation cycles with fluxes and COD values of filtrates. All the feed emulsions were separated by TiO<sub>2</sub>@FOTS-AP-coated SSMs. Hexane and isooctane were used to prepare water-in-oil and oil-in-water emulsion, respectively.
